# Supplementary material for: Effects of Mould Temperature on Rice Bran-Based Bioplastics Obtained by Injection Moulding
Source: MDPI journal article supplement (doi:10.3390/polym13030398), 2021-01-27
Supplement: s1 [file s1]

Article

# Effects of Mould Temperature on Rice Bran-Based Bioplastics Obtained by Injection Moulding

María Alonso-González <sup>1,\*</sup>, Manuel Felix <sup>2</sup>, Antonio Guerrero <sup>2</sup> and Alberto Romero <sup>1</sup>

<sup>1</sup> Departamento de Ingeniería Química, Facultad de Química, Universidad de Sevilla, 41012 Sevilla, Spain; alromero@us.es

<sup>2</sup> Departamento de Ingeniería Química, Escuela Politécnica Superior, Universidad de Sevilla, 41011 Sevilla, Spain; mfelix@us.es (M.F.); aguerrero@us.es (A.G.)

\* Correspondence: [maralonso@us.es](mailto:maralonso@us.es); Tel.: +34-635-313-411

## Supplementary Materials

**Citation:** Alonso-González, M.; Felix, M.; Guerrero, A.; Romero, A. Effects of Mould Temperature on Rice Bran-Based Bioplastics Obtained by Injection Moulding. *Polymers* **2021**, *13*, 398. <https://doi.org/10.3390/10.3390/polym13030398>

Academic Editor:

Alonso-González M.

Received: 13 January 2021

Accepted: 25 January 2021

Published: 27 January 2021

**Publisher's Note:** MDPI stays neutral with regard to jurisdictional claims in published maps and institutional affiliations.

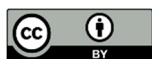

**Copyright:** © 2021 by the authors. Licensee MDPI, Basel, Switzerland. This article is an open access article distributed under the terms and conditions of the Creative Commons Attribution (CC BY) license (<http://creativecommons.org/licenses/by/4.0/>).

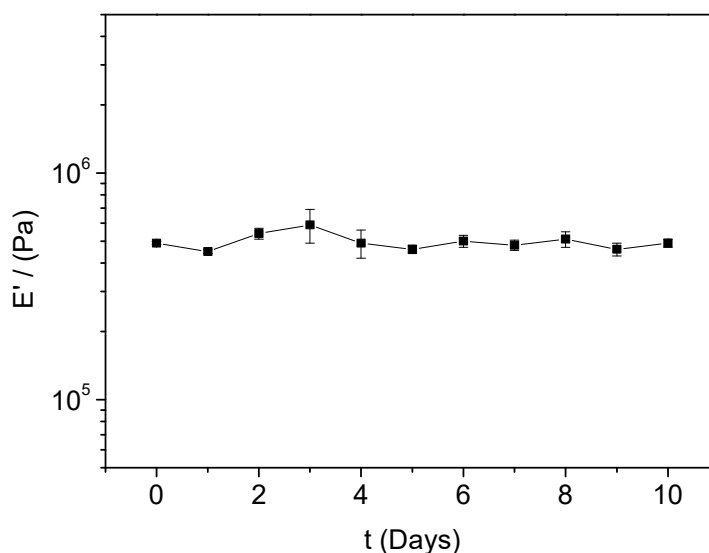

**Figure S1.** Elastic modulus ( $E'$ ) during the aging process of the doughs obtained after mixing (kept in closed containers) versus time. .
